# Supplementary material for: Cell contacts and pericellular matrix in the Xenopus gastrula chordamesoderm
Source: PubMed Central journal article supplement (PMC10861091; doi:10.1371/journal.pone.0297420), 2024-02-12
Supplement: pone.0297420.s005.pdf [file pone.0297420.s005.pdf]

## S1 Table

Relative adhesiveness  $\alpha$  at low ( $w < 250$  nm) and high ( $w \geq 250$  nm) contact widths.

|        | Contact width $< 250$ nm |        |     |          | Contact width $\geq 250$ nm |        |     |              |
|--------|--------------------------|--------|-----|----------|-----------------------------|--------|-----|--------------|
|        | Av                       | SD     | n   | p(MO/wt) | Av                          | SD     | n   | p (low/high) |
| Wt     | 0.1326                   | 0.0898 | 143 |          | 0.2260                      | 0.1380 | 6   | 0.0158       |
| CadMO  | 0.0966                   | 0.0786 | 259 | 0.0001   | 0.2495                      | 0.1380 | 249 | 0.0001       |
| FNMO   | 0.1030                   | 0.0871 | 476 | 0.0004   | 0.1853                      | 0.1244 | 53  | 0.0001       |
| Has2MO | 0.0842                   | 0.0693 | 165 | 0.0001   | 0.2040                      | 0.1234 | 91  | 0.0001       |
| Syn4MO | 0.2339                   | 0.1611 | 423 | 0.0001   | 0.3806                      | 0.1834 | 408 | 0.0001       |

Av, average of  $\alpha$  values; SD, standard deviation; n, number of  $\alpha$ - $w$  data points, i.e. gap-contact transitions; p (MO/wt), p-values for significance morphants vs. untreated CM (wt); p (low/high), p-values for significance low vs. high contact widths.
