# Supplementary material for: Cell contacts and pericellular matrix in the Xenopus gastrula chordamesoderm
Source: PubMed Central journal article supplement (PMC10861091; doi:10.1371/journal.pone.0297420), 2024-02-12
Supplement: pone.0297420.s006.pdf [file pone.0297420.s006.pdf]

## S2 Table

Positions of first peak in  $\alpha$  frequency distributions in consecutive width brackets.

| Center of width bracket | 25 nm | 75 nm | 150 nm | 300 nm | 600 nm | 1000 nm |
|-------------------------|-------|-------|--------|--------|--------|---------|
| Wt                      | 0.088 | 0.063 | 0.088  | 0.133  |        |         |
| CadMO                   | 0.038 | 0.038 | 0.088  | 0.133  | 0.138  | 0.163   |
| FNMO                    | 0.063 | 0.063 | 0.063  | 0.063  | 0.163  |         |
| Has2MO                  | 0.038 | 0.063 | 0.038  | 0.063  | 0.163  |         |
| Syn4MO                  | 0.088 | 0.063 | 0.088  | 0.113  | 0.138  | 0.213   |
| Average morphants       | 0.057 | 0.057 | 0.069  | 0.088  | 0.151  |         |

Frequencies of  $\alpha$  were binned in 0.025 intervals of  $\alpha$  and the position of the first peak is indicated as the mid-point of a bin, as read off from Fig 8 and S3 Fig, for width brackets 0-50 nm, 50-100 nm, 100-200 nm, 200-400 nm, 400-800 nm, and 800-1200 nm. The mid-points of these brackets are indicated.
