# Supplementary material for: Cell contacts and pericellular matrix in the Xenopus gastrula chordamesoderm
Source: PubMed Central journal article supplement (PMC10861091; doi:10.1371/journal.pone.0297420), 2024-02-12
Supplement: pone.0297420.s007.pdf [file pone.0297420.s007.pdf]

### S3 Table

Regression line parameters.

|        | $\alpha_0$ | $\Delta\alpha/\Delta w$ [ $\mu\text{m}^{-1}$ ] | r     | d [nm] |
|--------|------------|------------------------------------------------|-------|--------|
| wt     | 0.017      | 0.261                                          | 0.935 | 130    |
| CadMO  | 0.013      | 0.114                                          | 0.988 | 227    |
| FNMO   | 0.014      | 0.119                                          | 0.978 | 235    |
| HasMO  | 0.009      | 0.102                                          | 0.972 | 172    |
| Syn4MO | 0.023      | 0.074                                          | 0.960 | 625    |

Regression lines delineating the lower boundaries of  $\alpha - w$  distributions were determined as described in the main text.  $\alpha_0$ , intersection of regression line with  $\alpha$  axis;  $\Delta\alpha/\Delta w$ , slope of regression line; r, regression coefficient; d, interdigitation distance  $d = 2\alpha_0/(\Delta\alpha/\Delta w)$ . The calculated d is comparable to the measured average lengths of the shortest LSM units (“stubs”) in normal contacts (156 nm), FN morphants (128 nm) and Has1 morphants (111 nm) shown in Fig 6F-H.
